# Supplementary material for: Postoperative Organ Dysfunction Risk Stratification Using Extracellular Vesicles-derived circRNAs in Pediatric Congenital Heart Surgery
Source: Preprints.org preprint supplement (doi:10.20944/preprints202407.1123.v1), 2024-07-15
Supplement: Supplementary file 1 [file supplementary]

OD

NOD

CD63  
EpCAM  
ANXA5  
TSG101  
Blank  
Positive  
Control

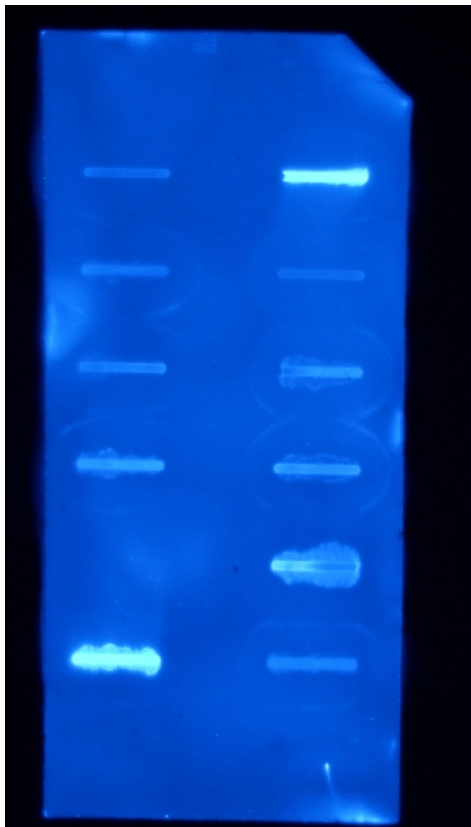

Positive  
Control  
GM130  
FLOT1  
ICAM  
ALIX  
CD81

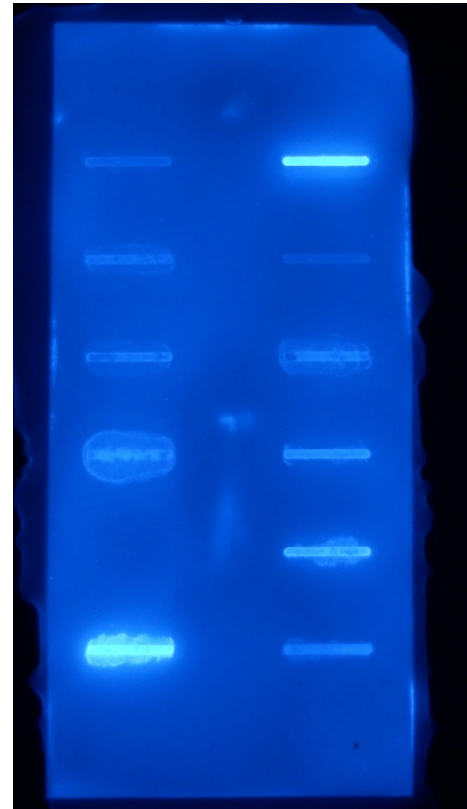

**Supplementary 1**
