# Supplementary material for: Postoperative Organ Dysfunction Risk Stratification Using Extracellular Vesicles-derived circRNAs in Pediatric Congenital Heart Surgery
Source: Preprints.org preprint supplement (doi:10.20944/preprints202407.1123.v1), 2024-07-15
Supplement: Supplementary file 2 [file supplementary]

**Supplementary Table 2: Differential expression analysis of housekeeping EV miRNAs in OD versus NOD at post-surgery**

|             | Base mean | log2(FC) | FDR  |
|-------------|-----------|----------|------|
| miR-16-5p   | 752.83    | 1.05     | 0.21 |
| miR-1228-3p | 2.14      | 0.98     | NA   |
| let-7a-5p   | 27449.34  | 0.94     | 0.34 |
| miR-23a-3p  | 422.12    | 0.25     | 0.91 |
| miR-425-5p  | 175.68    | 1.09     | 0.14 |

Data are expressed as mean ± standard deviation.

Abbreviations: miR: microRNA; FC: Fold Change; FDR: False Discovery Rate.
